# Supplementary material
Source: MDPI journal article supplement (https://www.mdpi.com/2071-1050/12/18/7700)
Supplement: s1 [file s1]

Supplementary Material to

## Citizen Science in the Field: Co-experimentation at Pilot Scale for Sustainable Use of Natural Resources

Rosana Maria Kral <sup>1,\*</sup>, Rizki Maftukhah <sup>2,3</sup>, Axel Mentler <sup>3</sup>, Murtiningrum Murtiningrum <sup>2</sup>, Ngadisih Ngadisih <sup>2</sup> and Katharina Maria Keiblinger <sup>3</sup>

<sup>1</sup> Department of Sustainable Agricultural Systems, Institute for Development Research, University of Natural Resources and Life Sciences, 1190 Vienna, Austria

<sup>2</sup> Department of Agricultural and Biosystem Engineering, Faculty of Agricultural Technology, Universitas Gadjah Mada, Yogyakarta 55281, Indonesia; maftukhah.rizki@mail.ugm.ac.id (R.M.); tiningm@ugm.ac.id (M.M.); ngadisih@ugm.ac.id (N.N.)

<sup>3</sup> Department of Forest and Soil Sciences, Institute of Soil Research, University of Natural Resources and Life Sciences, 1190 Vienna, Austria; maftukhah.rizki@students.boku.ac.at (R.M.); axel.mentler@boku.ac.at (A.M.); katharina.keiblinger@boku.ac.at (K.M.K.)

\* Correspondence: rosana.kral@boku.ac.at; Tel.: +43-1-47654-93412

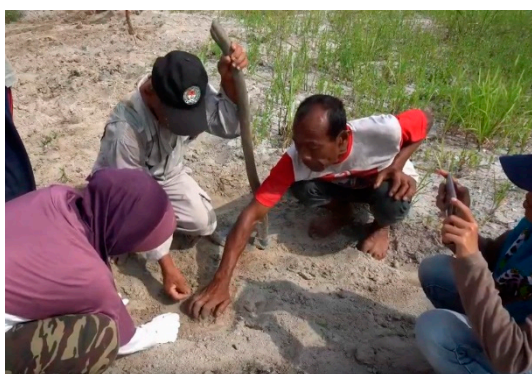

(a)

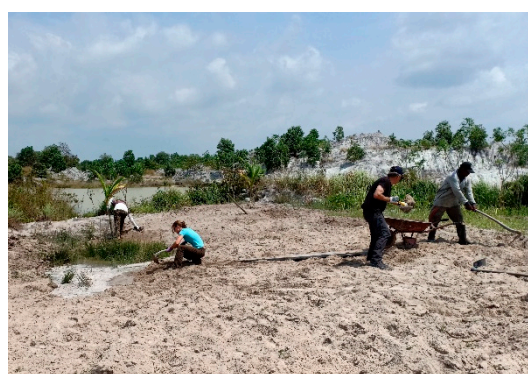

(b)

**Figure S1.** Joint Establishment of Co-experimentation Site. (a) Farmers show researchers that the site could still be used to mine tin from near-surface deposits; (b) Farmers and researchers level the future field site prior to setting up experimental plots and amending with soil additives. July 2018.

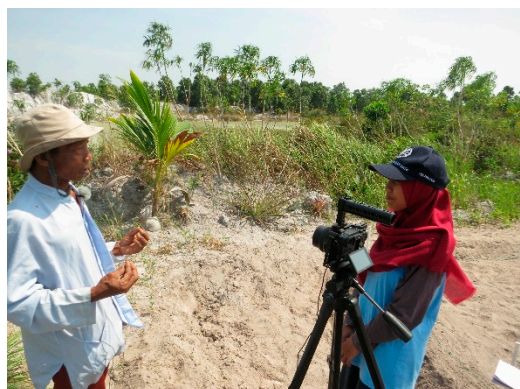

**Figure S2.** Production of Outreach Material at Field Site. Having set up the new field site, one of the involved farmers explains for the accompanying video documentation to one of the involved researchers why he focuses on agriculture as a livelihood option (July/ August 2018).

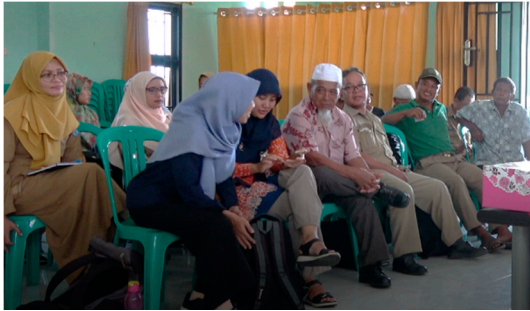

(a)

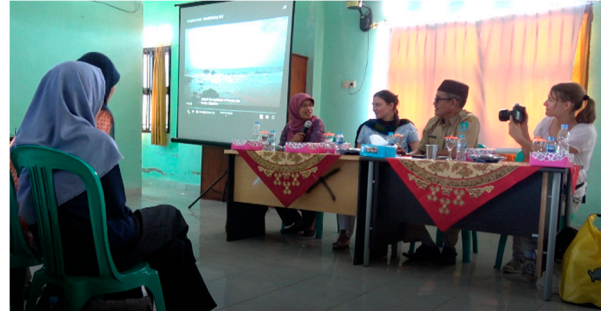

(b)

**Figure S3.** Example of a Scaling-out Activity of a Partner. (a) Knowledge sharing on co-experimentation site and first results at the headquarters of extension services to farmers and extension agents. The first video documentary was screened as part of the presentation (from left to right: extension agents, R.M., N.N., involved farmers, extension agents, interested farmers); (b) Discussion of approach and results at knowledge sharing event (M.M. with microphone, R.M.K., Pak Kemas, head of Department of Agriculture, K.M.K.; July 2019).

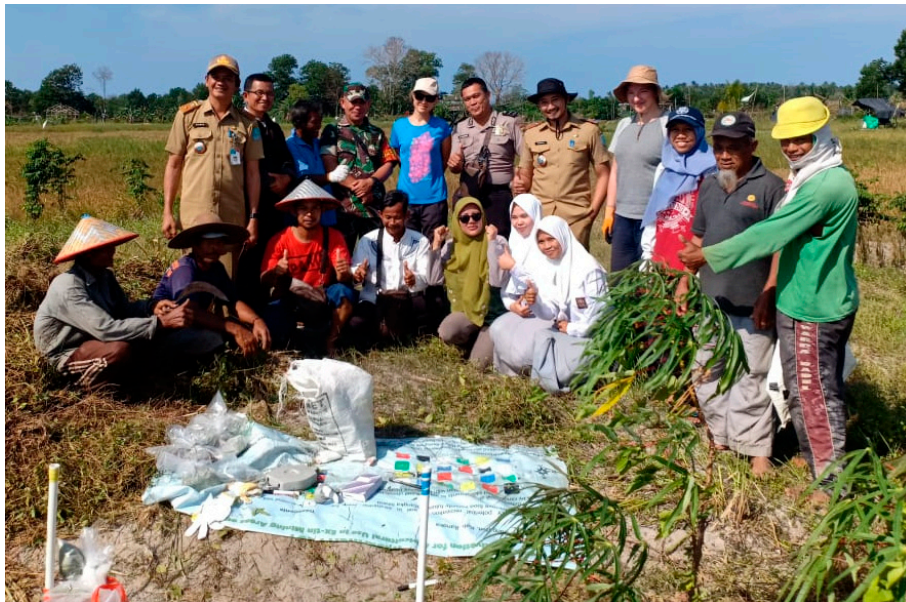

**Figure S4.** Group Picture with Partners after Harvesting, Sampling and Preparing for Second Year of Cropping. Front row (from left to right): farmers, N.N., visiting students from nearby vocational school who train for later work in agricultural services. Back row, standing: Village head Mr. Ridwan, farmer, government officials, K.M.K., village head Mr. Ramdan, R.M.K., R.M., farmers (August 2019).
